# Supplementary material
Source: HighWire-hosted journal article supplement (https://jmg.bmj.com/content/57/9/624)
Supplement: inline-supplementary-material-1 [file inline-supplementary-material-1.xlsx]

## Sheet: Supplementary Table S1
Gene	OMIM (Gene)	Phenotype	OMIM (Phenotype)
AARS	601065	Epileptic encephalopathy, early infantile, 29	616339
ABAT	137150	GABA-transaminase deficiency	613163
ABCC8	600509	Hypoglycemia of infancy, leucine-sensitive	240800
ABCD1	300371	Adrenoleukodystrophy	300100
ACADSB	600301	2-methylbutyrylglycinuria	610006
ACOX1	609751	Peroxisomal acyl-CoA oxidase deficiency	264470
ACTB	102630	Baraitser-Winter syndrome 1	243310
ACTG1	102560	Baraitser-Winter syndrome 2	614583
ACY1	104620	Aminoacylase 1 deficiency	609924
ADAM22	603709	?Epileptic encephalopathy, early infantile, 61	617933
ADAT3	615302	Mental retardation, autosomal recessive 36	615286
ADCK3	606980	Coenzyme Q10 deficiency, primary, 4	612016
ADK	102750	Hypermethioninemia due to adenosine kinase deficiency	614300
ADPRHL2	610624	Neurodegeneration, childhood-onset, stress-induced, with variable ataxia and seizures	618170
ADRA2B	104260	Epilepsy, myoclonic, familial adult, 2	607876
ADSL	608222	Adenylosuccinase deficiency	103050
AIMP1	603605	Leukodystrophy, hypomyelinating, 3	260600
ALDH5A1	610045	Succinic semialdehyde dehydrogenase deficiency	271980
ALDH7A1	107323	Epilepsy, pyridoxine-dependent	266100
ALG1	605907	Congenital disorder of glycosylation, type Ik	608540
ALG11	613666	Congenital disorder of glycosylation, type Ip	613661
ALG13	300776	Epileptic encephalopathy, early infantile, 36	300884
ALG3	608750	Congenital disorder of glycosylation, type Id	601110
ALG9	606941	Congenital disorder of glycosylation, type Il	608776
AMACR	604489	Alpha-methylacyl-CoA racemase deficiency	614307
AMT	238310	Glycine encephalopathy	605899
ANTXR1	606410	GAPO syndrome	230740
AP3B2	602166	Epileptic encephalopathy, early infantile, 48	617276
AP3D1	607246	?Hermansky-Pudlak syndrome 10	617050
AP4S1	607243	Spastic paraplegia 52, autosomal recessive	614067
APOPT1	616003	Mitochondrial complex IV deficiency	220110
ARG1	608313	Argininemia	207800
ARHGAP31	610911	Adams-Oliver syndrome 1	100300
ARHGEF9	300429	Epileptic encephalopathy, early infantile, 8	300607
ARSA	607574	Metachromatic leukodystrophy	250100
ARV1	611647	Epileptic encephalopathy, early infantile, 38	617020
ARX	300382	Epileptic encephalopathy, early infantile, 1	308350
ASAH1	613468	Spinal muscular atrophy with progressive myoclonic epilepsy	159950
ASXL2	612991	Shashi-Pena syndrome	617190
ATAD1	614452	Hyperekplexia 4	618011
ATIC	601731	AICA-ribosiduria due to ATIC deficiency	608688
ATN1	607462	Dentatorubro-pallidoluysian atrophy	125370
ATP1A1	182310	Hypomagnesemia, seizures, and mental retardation 2	618314
ATP1A2	182340	Alternating hemiplegia of childhood 1	104290
ATP1A3	182350	Alternating hemiplegia of childhood 2	614820
ATP2A2	108740	Darier disease	124200
ATP6AP2	300556	Mental retardation, X-linked, syndromic, Hedera type	300423
ATP6V0A2	611716	Cutis laxa, autosomal recessive, type IIA	219200
ATP6V1A	607027	Epileptic encephalopathy, infantile or early childhood, 3	618012
ATRX	300032	Alpha-thalassemia/mental retardation syndrome	301040
ATXN10	611150	Spinocerebellar ataxia 10	603516
BCAP31	300398	Deafness, dystonia, and cerebral hypomyelination	300475
BCKDK	614901	Branched-chain ketoacid dehydrogenase kinase deficiency	614923
BOLA3	613183	Multiple mitochondrial dysfunctions syndrome 2 with hyperglycinemia	614299
BRAT1	614506	Neurodevelopmental disorder with cerebellar atrophy and with or without seizures	618056
C10orf2	606075	Mitochondrial DNA depletion syndrome 7 (hepatocerebral type)	271245
C12orf57	615140	Temtamy syndrome	218340
C6orf70	615532	?Periventricular nodular heterotopia 6	615544
CACNA1A	601011	Epileptic encephalopathy, early infantile, 42	617106
CACNA1E	601013	Epileptic encephalopathy, early infantile, 69	618285
CACNA1G	604065	Spinocerebellar ataxia 42, early-onset, severe, with neurodevelopmental deficits	618087
CACNA1H	607904	{Epilepsy, idiopathic generalized, susceptibility to, 6}	611942
CACNB4	601949	{Epilepsy, idiopathic generalized, susceptibility to, 9}	607682
CAD	114010	Epileptic encephalopathy, early infantile, 50	616457
CAMTA1	611501	Cerebellar ataxia, nonprogressive, with mental retardation	614756
CARS2	612800	Combined oxidative phosphorylation deficiency 27	616672
CASK	300172	Mental retardation and microcephaly with pontine and cerebellar hypoplasia	300749
CASR	601199	{Epilepsy idiopathic generalized, susceptibility to, 8}	612899
CCDC88A	609736	?PEHO syndrome-like	617507
CCM2	607929	Cerebral cavernous malformations-2	603284
CDKL5	300203	Epileptic encephalopathy, early infantile, 2	300672
CERS1	606919	?Epilepsy, progressive myoclonic, 8	616230
CHD2	602119	Epileptic encephalopathy, childhood-onset	615369
CHRNA2	118502	Epilepsy, nocturnal frontal lobe, type 4	610353
CHRNA4	118504	Epilepsy, nocturnal frontal lobe, 1	600513
CHRNB2	118507	Epilepsy, nocturnal frontal lobe, 3	605375
CLCN2	600570	{Epilepsy, juvenile myoclonic, susceptibility to, 8}	607628
CLCN4	302910	Raynaud-Claes syndrome	300114
CLN3	607042	Ceroid lipofuscinosis, neuronal, 3	204200
CLN5	608102	Ceroid lipofuscinosis, neuronal, 5	256731
CLN6	606725	Ceroid lipofuscinosis, neuronal, 6	601780
CLN8	607837	Ceroid lipofuscinosis, neuronal, 8, Northern epilepsy variant	610003
CLPB	616254	3-methylglutaconic aciduria, type VII, with cataracts, neurologic involvement and neutropenia	616271
CLPP	601119	Perrault syndrome 3	614129
CLTC	118955	Mental retardation, autosomal dominant 56	617854
CNKSR2	300724	Mental retardation, X-linked, syndromic, Houge type	301008
CNPY3	610774	Epileptic encephalopathy, early infantile, 60	617929
CNTN2	190197	?Epilepsy, myoclonic, familial adult, 5	615400
CNTNAP1	602346	Hypomyelinating neuropathy, congenital, 3	618186
CNTNAP2	604569	Cortical dysplasia-focal epilepsy syndrome	610042
COG7	606978	Congenital disorder of glycosylation, type IIe	608779
COG8	606979	Congenital disorder of glycosylation, type IIh	611182
COL4A1	120130	Schizencephaly	269160
COQ2	609825	Coenzyme Q10 deficiency, primary, 1	607426
COQ4	612898	Coenzyme Q10 deficiency, primary, 7	616276
COX10	602125	Mitochondrial complex IV deficiency	220110
COX14	614478	?Mitochondrial complex IV deficiency	220110
COX20	614698	Mitochondrial complex IV deficiency	220110
COX6B1	124089	Mitochondrial complex IV deficiency	220110
COX8A	123870	?Mitochondrial complex IV deficiency	220110
CPA6	609562	Epilepsy, familial temporal lobe, 5	614417
CPLX1	605032	Epileptic encephalopathy, early infantile, 63	617976
CPS1	608307	Carbamoylphosphate synthetase I deficiency	237300
CSTB	601145	Epilepsy, progressive myoclonic 1A (Unverricht and Lundborg)	254800
CTSA	613111	Galactosialidosis	256540
CTSD	116840	Ceroid lipofuscinosis, neuronal, 10	610127
CUX2	610648	Epileptic encephalopathy, early infantile, 67	618141
CYFIP2	606323	Epileptic encephalopathy, early infantile, 65	618008
D2HGDH	609186	D-2-hydroxyglutaric aciduria	600721
DCX	300121	Lissencephaly, X-linked	300067
DDX3X	300160	Mental retardation, X-linked 102	300958
DEAF1	602635	?Dyskinesia, seizures, and intellectual developmental disorder	617171
DENND5A	617278	Epileptic encephalopathy, early infantile, 49	617281
DEPDC5	614191	Epilepsy, familial focal, with variable foci 1	604364
DHDDS	608172	Developmental delay and seizures with or without movement abnormalities	617836
DHFR	126060	Megaloblastic anemia due to dihydrofolate reductase deficiency	613839
DNAJC5	611203	Ceroid lipofuscinosis, neuronal, 4, Parry type	162350
DNM1	602377	Epileptic encephalopathy, early infantile, 31	616346
DNM1L	603850	Encephalopathy, lethal, due to defective mitochondrial peroxisomal fission 1	614388
DOCK6	614194	Adams-Oliver syndrome 2	614219
DOCK7	615730	Epileptic encephalopathy, early infantile, 23	615859
DPM1	603503	Congenital disorder of glycosylation, type Ie	608799
DPM2	603564	Congenital disorder of glycosylation, type Iu	615042
DPYD	612779	Dihydropyrimidine dehydrogenase deficiency	274270
DYRK1A	600855	Mental retardation, autosomal dominant 7	614104
EBP	300205	MEND syndrome	300960
ECE1	600423	?Hirschsprung disease, cardiac defects, and autonomic dysfunction	613870
ECM1	602201	Urbach-Wiethe disease	247100
EEF1A2	602959	Epileptic encephalopathy, early infantile, 33	616409
EFHC1	608815	{Epilepsy, juvenile absence, susceptibility to, 1}	607631
EHMT1	607001	Kleefstra syndrome 1	610253
EIF2B1	606686	Leukoencephalopathy with vanishing white matter	603896
EIF2B2	606454	Leukoencephalopathy with vanishing white matter	603896
EIF2B3	606273	Leukoencephalopathy with vanishing white matter	603896
EIF2B4	606687	Leukoencephalopathy with vanishing white matter	603896
EIF2B5	603945	Leukoencephalopathy with vanishing white matter	603896
EIF2S3	300161	MEHMO syndrome	300148
EML1	602033	Band heterotopia	600348
EMX2	600035	Schizencephaly	269160
EPM2A	607566	Epilepsy, progressive myoclonic 2A (Lafora)	254780
ERLIN2	611605	Spastic paraplegia 18, autosomal recessive	611225
EXOSC3	606489	Pontocerebellar hypoplasia, type 1B	614678
EXT2	608210	?Seizures, scoliosis, and macrocephaly syndrome	616682
FAR1	616107	Peroxisomal fatty acyl-CoA reductase 1 disorder	616154
FARS2	611592	Combined oxidative phosphorylation deficiency 14	614946
FASTKD2	612322	?Mitochondrial complex IV deficiency	220110
FBXO11	607871	Intellectual developmental disorder with dysmorphic facies and behavioral abnormalities	618089
FGF12	601513	Epileptic encephalopathy, early infantile, 47	617166
FGFR1	136350	Encephalocraniocutaneous lipomatosis	613001
FH	136850	Fumarase deficiency	606812
FIG4	609390	?Polymicrogyria, bilateral temporooccipital	612691
FKTN	607440	Muscular dystrophy-dystroglycanopathy (congenital with brain and eye anomalies), type A, 4	253800
FLNA	300017	Heterotopia, periventricular, 1	300049
FOLR1	136430	Neurodegeneration due to cerebral folate transport deficiency	613068
FOXG1	164874	Rett syndrome, congenital variant	613454
FRRS1L	604574	Epileptic encephalopathy, early infantile, 37	616981
FTL	134790	Hyperferritinemia-cataract syndrome	600886
FUK	608675	Congenital disorder of glycosylation with defective fucosylation 2	618324
GABBR2	607340	Epileptic encephalopathy, early infantile, 59	617904
GABRA1	137160	Epileptic encephalopathy, early infantile, 19	615744
GABRB1	137190	Epileptic encephalopathy, early infantile, 45	617153
GABRB2	600232	Epileptic encephalopathy, infantile or early childhood, 2	617829
GABRB3	137192	Epileptic encephalopathy, early infantile, 43	617113
GABRD	137163	{Epilepsy, idiopathic generalized, 10}	613060
GABRG2	137164	Epilepsy, generalized, with febrile seizures plus, type 3	611277
GAL	137035	?Epilepsy, familial temporal lobe, 8	616461
GAMT	601240	Cerebral creatine deficiency syndrome 2	612736
GBA	606463	Gaucher disease, type I	230800
GCSH	238330	?Glycine encephalopathy	605899
GLB1	611458	GM1-gangliosidosis, type I	230500
GLDC	238300	Glycine encephalopathy	605899
GLE1	603371	Congenital arthrogryposis with anterior horn cell disease	611890
GLI3	165240	Greig cephalopolysyndactyly syndrome	175700
GLRA1	138491	Hyperekplexia 1	149400
GLS	138280	Epileptic encephalopathy, early infantile, 71	618328
GMPPB	615320	Muscular dystrophy-dystroglycanopathy (congenital with mental retardation), type B, 14	615351
GNAO1	139311	Epileptic encephalopathy, early infantile, 17	615473
GOSR2	604027	Epilepsy, progressive myoclonic 6	614018
GPAA1	603048	Glycosylphosphatidylinositol biosynthesis defect 15	617810
GPR98	602851	?Febrile seizures, familial, 4	604352
GRIA3	305915	Mental retardation, X-linked 94	300699
GRIA4	138246	Neurodevelopmental disorder with or without seizures and gait abnormalities	617864
GRIK2	138244	Mental retardation, autosomal recessive, 6	611092
GRIN1	138249	Neurodevelopmental disorder with or without hyperkinetic movements and seizures, autosomal dominant	614254
GRIN2A	138253	Epilepsy, focal, with speech disorder and with or without mental retardation	245570
GRIN2B	138252	Epileptic encephalopathy, early infantile, 27	616139
GRIN2D	602717	Epileptic encephalopathy, early infantile, 46	617162
GSS	601002	Glutathione synthetase deficiency	266130
GUF1	617064	?Epileptic encephalopathy, early infantile, 40	617065
GYS1	138570	Glycogen storage disease 0, muscle	611556
HAX1	605998	Neutropenia, severe congenital 3, autosomal recessive	610738
HCFC1	300019	Mental retardation, X-linked 3 (methylmalonic acidemia and homocysteinemia, cblX type )	309541
HCN1	602780	Epileptic encephalopathy, early infantile, 24	615871
HECW2	617245	Neurodevelopmental disorder with hypotonia, seizures, and absent language	617268
HERC1	605109	Macrocephaly, dysmorphic facies, and psychomotor retardation	617011
HIBCH	610690	3-hydroxyisobutryl-CoA hydrolase deficiency	250620
HNRNPU	602869	Epileptic encephalopathy, early infantile, 54	617391
HSD17B10	300256	HSD10 mitochondrial disease	300438
HSD17B4	601860	D-bifunctional protein deficiency	261515
IBA57	615316	Multiple mitochondrial dysfunctions syndrome 3	615330
ICK	612325	{Epilepsy, juvenile myoclonic, susceptibility to, 10}	617924
IDS	300823	Mucopolysaccharidosis II	309900
IER3IP1	609382	Microcephaly, epilepsy, and diabetes syndrome	614231
IQSEC2	300522	Mental retardation, X-linked 1/78	309530
IRF2BPL	611720	Neurodevelopmental disorder with regression, abnormal movements, loss of speech, and seizures	618088
ISG15	147571	Immunodeficiency 38	616126
ITPA	147520	Epileptic encephalopathy, early infantile, 35	616647
KANSL1	612452	Koolen-De Vries syndrome	610443
KCNA1	176260	Episodic ataxia/myokymia syndrome	160120
KCNA2	176262	Epileptic encephalopathy, early infantile, 32	616366
KCNB1	600397	Epileptic encephalopathy, early infantile, 26	616056
KCNC1	176258	Epilepsy, progressive myoclonic 7	616187
KCNH1	603305	Temple-Baraitser syndrome	611816
KCNJ10	602208	SESAME syndrome	612780
KCNJ11	600937	Diabetes, permanent neonatal, with or without neurologic features	606176
KCNK4	605720	Facial dysmorphism, hypertrichosis, epilepsy, intellectual/developmental delay, and gingival overgrowth syndrome	618381
KCNMA1	600150	Paroxysmal nonkinesigenic dyskinesia, 3, with or without generalized epilepsy	609446
KCNQ1	607542	Long QT syndrome 1	192500
KCNQ2	602235	Seizures, benign neonatal, 1	121200
KCNQ3	602232	Seizures, benign neonatal, 2	121201
KCNQ5	607357	Mental retardation, autosomal dominant 46	617601
KCNT1	608167	Epilepsy, nocturnal frontal lobe, 5	615005
KCNT2	610044	?Epileptic encephalopathy, early infantile, 57	617771
KCTD7	611725	Epilepsy, progressive myoclonic 3, with or without intracellular inclusions	611726
KDM5C	314690	Mental retardation, X-linked, syndromic, Claes-Jensen type	300534
KIAA1109	611565	Alkuraya-Kucinskas syndrome	617822
KIAA1715	610236	Neurodevelopmental disorder with epilepsy and hypoplasia of the corpus callosum	618090
KIAA2022	300524	Mental retardation, X-linked 98	300912
KIF11	148760	Microcephaly with or without chorioretinopathy, lymphedema, or mental retardation	152950
KIF1A	601255	Mental retardation, autosomal dominant 9	614255
KIF2A	602591	Cortical dysplasia, complex, with other brain malformations 3	615411
KIF5A	602821	Myoclonus, intractable, neonatal	617235
KLHL15	300980	Mental retardation, X-linked 103	300982
KRAS	190070	Noonan syndrome 3	609942
KRIT1	604214	Cavernous malformations of CNS and retina	116860
L2HGDH	609584	L-2-hydroxyglutaric aciduria	236792
LAMA2	156225	Muscular dystrophy, congenital, merosin deficient or partially deficient	607855
LAMB1	150240	Lissencephaly 5	615191
LGI1	604619	Epilepsy, familial temporal lobe, 1	600512
LIAS	607031	Hyperglycinemia, lactic acidosis, and seizures	614462
LINGO1	609791	Mental retardation, autosomal recessive 64	618103
LIPT2	617659	Encephalopathy, neonatal severe, with lactic acidosis and brain abnormalities	617668
LMNB2	150341	?Epilepsy, progressive myoclonic, 9	616540
MAN1B1	604346	Mental retardation, autosomal recessive 15	614202
MBD5	611472	Mental retardation, autosomal dominant 1	156200
MBOAT7	606048	Mental retardation, autosomal recessive 57	617188
MCCC2	609014	3-Methylcrotonyl-CoA carboxylase 2 deficiency	210210
MCPH1	607117	Microcephaly 1, primary, autosomal recessive	251200
MDH2	154100	Epileptic encephalopathy, early infantile, 51	617339
MECP2	300005	Encephalopathy, neonatal severe	300673
MEF2C	600662	Mental retardation, stereotypic movements, epilepsy, and/or cerebral malformations	613443
MFF	614785	Encephalopathy due to defective mitochondrial and peroxisomal fission 2	617086
MFSD8	611124	Ceroid lipofuscinosis, neuronal, 7	610951
MLC1	605908	Megalencephalic leukoencephalopathy with subcortical cysts	604004
MTHFD1	172460	Combined immunodeficiency and megaloblastic anemia with or without hyperhomocysteinemia	617780
MTHFR	607093	Homocystinuria due to MTHFR deficiency	236250
MTHFS	604197	Neurodevelopmental disorder with microcephaly, epilepsy, and hypomyelination	618367
MTOR	601231	Smith-Kingsmore syndrome	616638
NAA10	300013	?Microphthalmia, syndromic 1	309800
NACC1	610672	Neurodevelopmental disorder with epilepsy, cataracts, feeding difficulties, and delayed brain myelination	617393
NARS2	612803	Combined oxidative phosphorylation deficiency 24	616239
NDN	602117	Prader-Willi syndrome	176270
NDUFA1	300078	Mitochondrial complex I deficiency, nuclear type 12	301020
NDUFV1	161015	Mitochondrial complex I deficiency, nuclear type 4	618225
NECAP1	611623	?Epileptic encephalopathy, early infantile, 21	615833
NEU1	608272	Sialidosis, type I	256550
NEUROD2	601725	Epileptic encephalopathy, early infantile, 72	618374
NF1	613113	Neurofibromatosis, type 1	162200
NGLY1	610661	Congenital disorder of deglycosylation	615273
NHLRC1	608072	Epilepsy, progressive myoclonic 2B (Lafora)	254780
NOTCH1	190198	Adams-Oliver syndrome 5	616028
NOTCH3	600276	Cerebral arteriopathy with subcortical infarcts and leukoencephalopathy 1	125310
NPRL2	607072	Epilepsy, familial focal, with variable foci 2	617116
NPRL3	600928	Epilepsy, familial focal, with variable foci 3	617118
NRXN1	600565	Pitt-Hopkins-like syndrome 2	614325
NTRK2	600456	Epileptic encephalopathy, early infantile, 58	617830
NUP133	607613	?Galloway-Mowat syndrome 8	618349
NUS1	610463	Mental retardation, autosomal dominant 55, with seizures	617831
OCLN	602876	Pseudo-TORCH syndrome 1	251290
OFD1	300170	Orofaciodigital syndrome I	311200
OPHN1	300127	Mental retardation, X-linked, with cerebellar hypoplasia and distinctive facial appearance	300486
PACS2	610423	Epileptic encephalopathy, early infantile, 66	618067
PAFAH1B1	601545	Lissencephaly 1	607432
PAH	612349	Phenylketonuria	261600
PAK3	300142	Mental retardation, X-linked 30/47	300558
PANK2	606157	Neurodegeneration with brain iron accumulation 1	234200
PCDH12	605622	Microcephaly, seizures, spasticity, and brain calcification	251280
PCDH19	300460	Epileptic encephalopathy, early infantile, 9	300088
PDHA1	300502	Pyruvate dehydrogenase E1-alpha deficiency	312170
PDSS2	610564	Coenzyme Q10 deficiency, primary, 3	614652
PET100	614770	Mitochondrial complex IV deficiency	220110
PEX14	601791	Peroxisome biogenesis disorder 13A (Zellweger)	614887
PEX19	600279	Peroxisome biogenesis disorder 12A (Zellweger)	614886
PEX5	600414	Peroxisome biogenesis disorder 2A (Zellweger)	214110
PEX7	601757	Peroxisome biogenesis disorder 9B	614879
PGAP1	611655	Mental retardation, autosomal recessive 42	615802
PGK1	311800	Phosphoglycerate kinase 1 deficiency	300653
PHACTR1	608723	Epileptic encephalopathy, early infantile, 70	618298
PHF6	300414	Borjeson-Forssman-Lehmann syndrome	301900
PHGDH	606879	Phosphoglycerate dehydrogenase deficiency	601815
PIGA	311770	Multiple congenital anomalies-hypotonia-seizures syndrome 2	300868
PIGC	601730	Glycosylphosphatidylinositol biosynthesis defect 16	617816
PIGH	600154	Glycosylphosphatidylinositol biosynthesis defect 17	618010
PIGL	605947	CHIME syndrome	280000
PIGN	606097	Multiple congenital anomalies-hypotonia-seizures syndrome 1	614080
PIGP	605938	?Epileptic encephalopathy, early infantile, 55	617599
PIGS	610271	Glycosylphosphatidylinositol biosynthesis defect 18	618143
PIGT	610272	Multiple congenital anomalies-hypotonia-seizures syndrome 3	615398
PIGV	610274	Hyperphosphatasia with mental retardation syndrome 1	239300
PLA2G6	603604	Infantile neuroaxonal dystrophy 1	256600
PLAA	603873	Neurodevelopmental disorder with progressive microcephaly, spasticity, and brain anomalies	617527
PLCB1	607120	Epileptic encephalopathy, early infantile, 12	613722
PLP1	300401	Pelizaeus-Merzbacher disease	312080
PMM2	601785	Congenital disorder of glycosylation, type Ia	212065
PMPCB	603131	Multiple mitochondrial dysfunctions syndrome 6	617954
PNKP	605610	Microcephaly, seizures, and developmental delay	613402
PNPO	603287	Pyridoxamine 5'-phosphate oxidase deficiency	610090
POLG	174763	Progressive external ophthalmoplegia, autosomal recessive 1	258450
POMGNT1	606822	Muscular dystrophy-dystroglycanopathy (congenital with brain and eye anomalies), type A, 3	253280
PPP2CA	176915	Neurodevelopmental disorder and language delay with or without structural brain abnormalities	618354
PPP3CA	114105	Epileptic encephalopathy, infantile or early childhood, 1	617711
PPT1	600722	Ceroid lipofuscinosis, neuronal, 1	256730
PRDM8	616639	?Epilepsy, progressive myoclonic, 10	616640
PRICKLE1	608500	Epilepsy, progressive myoclonic 1B	612437
PRODH	606810	Hyperprolinemia, type I	239500
PROSC	604436	Epilepsy, early-onset, vitamin B6-dependent	617290
PRRT2	614386	Seizures, benign familial infantile, 2	605751
PUM1	607204	Spinocerebellar ataxia 47	617931
PURA	600473	Mental retardation, autosomal dominant 31	616158
PYCR2	616406	Leukodystrophy, hypomyelinating, 10	616420
QARS	603727	Microcephaly, progressive, seizures, and cerebral and cerebellar atrophy	615760
QDPR	612676	Hyperphenylalaninemia, BH4-deficient, C	261630
RAB11B	604198	Neurodevelopmental disorder with ataxic gait, absent speech, and decreased cortical white matter	617807
RAB39B	300774	Mental retardation, X-linked 72	300271
RAB3GAP1	602536	Warburg micro syndrome 1	600118
RAPGEF2	609530	?Epilepsy, familial adult myoclonic, 7	618075
RARS	107820	Leukodystrophy, hypomyelinating, 9	616140
RELN	600514	{Epilepsy, familial temporal lobe, 7}	616436
RFT1	611908	Congenital disorder of glycosylation, type In	612015
RHOBTB2	607352	Epileptic encephalopathy, early infantile, 64	618004
RILP	608500	Epilepsy, progressive myoclonic 1B	612437
RMND1	614917	Combined oxidative phosphorylation deficiency 11	614922
RNF13	609247	Epileptic encephalopathy, early infantile, 73	618379
ROGDI	614574	Kohlschutter-Tonz syndrome	226750
RORA	600825	Intellectual developmental disorder with or without epilepsy or cerebellar ataxia	618060
RORB	601972	{Epilepsy, idiopathic generalized, susceptibility to, 15}	618357
RPIA	180430	?Ribose 5-phosphate isomerase deficiency	608611
RPL10	312173	Mental retardation, X-linked, syndromic, 35	300998
RTTN	610436	Microcephaly, short stature, and polymicrogyria with seizures	614833
RUSC2	611053	Mental retardation, autosomal recessive 61	617773
SAMD12	618073	Epilepsy, familial adult myoclonic, 1	601068
SCARB2	602257	Epilepsy, progressive myoclonic 4, with or without renal failure	254900
SCN1A	182389	Epilepsy, generalized, with febrile seizures plus, type 2	604403
SCN1B	600235	Epileptic encephalopathy, early infantile, 52	617350
SCN2A	182390	Seizures, benign familial infantile, 3	607745
SCN3A	182391	Epilepsy, familial focal, with variable foci 4	617935
SCN5A	600163	Brugada syndrome 1	601144
SCN8A	600702	Seizures, benign familial infantile, 5	617080
SCN9A	603415	Epilepsy, generalized, with febrile seizures plus, type 7	613863
SCO1	603644	Mitochondrial complex IV deficiency	220110
SERAC1	614725	3-methylglutaconic aciduria with deafness, encephalopathy, and Leigh-like syndrome	614739
SERPINI1	602445	Encephalopathy, familial, with neuroserpin inclusion bodies	604218
SETBP1	611060	Mental retardation, autosomal dominant 29	616078
SETD2	612778	Luscan-Lumish syndrome	616831
SGSH	605270	Mucopolysaccharidosis type IIIA (Sanfilippo A)	252900
SHH	600725	Schizencephaly	269160
SIK1	605705	Epileptic encephalopathy, early infantile, 30	616341
SIX3	603714	Schizencephaly	269160
SLC12A5	606726	Epileptic encephalopathy, early infantile, 34	616645
SLC13A5	608305	Epileptic encephalopathy, early infantile, 25	615905
SLC17A5	604322	Sialic acid storage disorder, infantile	269920
SLC19A3	606152	Thiamine metabolism dysfunction syndrome 2 (biotin- or thiamine-responsive encephalopathy type 2)	607483
SLC1A2	600300	Epileptic encephalopathy, early infantile, 41	617105
SLC1A4	600229	Spastic tetraplegia, thin corpus callosum, and progressive microcephaly	616657
SLC25A1	190315	Combined D-2- and L-2-hydroxyglutaric aciduria	615182
SLC25A12	603667	Epileptic encephalopathy, early infantile, 39	612949
SLC25A15	603861	Hyperornithinemia-hyperammonemia-homocitrullinemia syndrome	238970
SLC25A22	609302	Epileptic encephalopathy, early infantile, 3	609304
SLC2A1	138140	{Epilepsy, idiopathic generalized, susceptibility to, 12}	614847
SLC35A2	314375	Congenital disorder of glycosylation, type IIm	300896
SLC35A3	605632	?Arthrogryposis, mental retardation, and seizures	615553
SLC45A1	605763	Intellectual developmental disorder with neuropsychiatric features	617532
SLC46A1	611672	Folate malabsorption, hereditary	229050
SLC6A1	137165	Myoclonic-atonic epilepsy	616421
SLC6A19	608893	Hartnup disorder	234500
SLC6A9	601019	Glycine encephalopathy with normal serum glycine	617301
SLC9A6	300231	Mental retardation, X-linked syndromic, Christianson type	300243
SMARCA2	600014	Nicolaides-Baraitser syndrome	601358
SMC1A	300040	Cornelia de Lange syndrome 2	300590
SMS	300105	Mental retardation, X-linked, Snyder-Robinson type	309583
SNIP1	608241	Psychomotor retardation, epilepsy, and craniofacial dysmorphism	614501
SNRPN	182279	Prader-Willi syndrome	176270
SOBP	613667	Mental retardation, anterior maxillary protrusion, and strabismus	613671
SPAST	604277	Spastic paraplegia 4, autosomal dominant	182601
SPATA5	613940	Epilepsy, hearing loss, and mental retardation syndrome	616577
SPN	602635	?Dyskinesia, seizures, and intellectual developmental disorder	617171
SPTAN1	182810	Epileptic encephalopathy, early infantile, 5	613477
SPTBN4	606214	Neurodevelopmental disorder with hypotonia, neuropathy, and deafness	617519
SRPX2	300642	?Rolandic epilepsy, mental retardation, and speech dyspraxia	300643
ST3GAL3	606494	?Epileptic encephalopathy, early infantile, 15	615006
ST3GAL5	604402	Salt and pepper developmental regression syndrome	609056
STAG1	604358	Mental retardation, autosomal dominant 47	617635
STAMBP	606247	Microcephaly-capillary malformation syndrome	614261
STRADA	608626	Polyhydramnios, megalencephaly, and symptomatic epilepsy	611087
STX1B	601485	Generalized epilepsy with febrile seizures plus, type 9	616172
STXBP1	602926	Epileptic encephalopathy, early infantile, 4	612164
SYN1	313440	Epilepsy, X-linked, with variable learning disabilities and behavior disorders	300491
SYNGAP1	603384	Mental retardation, autosomal dominant 5	612621
SYNJ1	604297	Epileptic encephalopathy, early infantile, 53	617389
SYP	313475	Mental retardation, X-linked 96	300802
SZT2	615463	Epileptic encephalopathy, early infantile, 18	615476
TACO1	612958	Mitochondrial complex IV deficiency	220110
TANGO2	616830	Metabolic encephalomyopathic crises, recurrent, with rhabdomyolysis, cardiac arrhythmias, and neurodegeneration	616878
TBC1D24	613577	Myoclonic epilepsy, infantile, familial	605021
TCF4	602272	Pitt-Hopkins syndrome	610954
TDP2	605764	Spinocerebellar ataxia, autosomal recessive 23	616949
TIMM50	607381	3-methylglutaconic aciduria, type IX	617698
TIMMDC1	615534	Mitochondrial complex I deficiency, nuclear type 31	618251
TLK2	608439	Mental retardation, autosomal dominant 57	618050
TMEM165	614726	Congenital disorder of glycosylation, type IIk	614727
TNRC6A	610739	?Epilepsy, familial adult myoclonic, 6	618074
TPP1	607998	Ceroid lipofuscinosis, neuronal, 2	204500
TRAK1	608112	Epileptic encephalopathy, early infantile, 68	618201
TRAPPC11	614138	Muscular dystrophy, limb-girdle, autosomal recessive 18	615356
TRAPPC2L	610970	Encephalopathy, progressive, early-onset, with episodic rhabdomyolysis	618331
TRAPPC6B	610397	Neurodevelopmental disorder with microcephaly, epilepsy, and brain atrophy	617862
TREX1	606609	Vasculopathy, retinal, with cerebral leukodystrophy	192315
TRIT1	617840	Combined oxidative phosphorylation deficiency 35	617873
TSC1	605284	Tuberous sclerosis-1	191100
TSC2	191092	Tuberous sclerosis-2	613254
TSEN15	608756	Pontocerebellar hypoplasia, type 2F	617026
TSEN2	608753	Pontocerebellar hypoplasia type 2B	612389
TSEN34	608754	?Pontocerebellar hypoplasia type 2C	612390
TSEN54	608755	Pontocerebellar hypoplasia type 2A	277470
TUBB2A	615101	Cortical dysplasia, complex, with other brain malformations 5	615763
TUBGCP6	610053	Microcephaly and chorioretinopathy, autosomal recessive, 1	251270
TXN2	609063	?Combined oxidative phosphorylation deficiency 29	616811
TYROBP	604142	Polycystic lipomembranous osteodysplasia with sclerosing leukoencephalopathy 1	221770
UBA5	610552	Epileptic encephalopathy, early infantile, 44	617132
UBE3A	601623	Angelman syndrome	105830
UFM1	610553	Leukodystrophy, hypomyelinating, 14	617899
UNC80	612636	Hypotonia, infantile, with psychomotor retardation and characteristic facies 2	616801
UPB1	606673	Beta-ureidopropionase deficiency	613161
VPS13B	607817	Cohen syndrome	216550
VPS53	615850	Pontocerebellar hypoplasia, type 2E	615851
WARS2	604733	Neurodevelopmental disorder, mitochondrial, with abnormal movements and lactic acidosis, with or without seizures	617710
WDR45B	609226	Neurodevelopmental disorder with spastic quadriplegia and brain abnormalities with or without seizures	617977
WDR73	616144	Galloway-Mowat syndrome 1	251300
WWOX	605131	Epileptic encephalopathy, early infantile, 28	616211
XK	314850	McLeod syndrome with or without chronic granulomatous disease	300842
YWHAG	605356	Epileptic encephalopathy, early infantile, 56	617665
ZC4H2	300897	Wieacker-Wolff syndrome	314580
ZDHHC15	300576	?Mental retardation, X-linked 91	300577
ZEB2	605802	Mowat-Wilson syndrome	235730
ZNHIT3	604500	PEHO syndrome	260565
